# Supplementary material for: Urban blue and green spaces in the UK: Distribution, equity and ecological implications
Source: Research Square preprint supplement (doi:10.21203/rs.3.rs-7156944/v1), 2025-09-09
Supplement: Supplementary file 1 [file 5ce437b2f58b6864aa5a60fd.docx]

# Supplementary Materials

Assistive materials for “Urban blue and green spaces in the UK: Distribution, equity and ecological implications”

**Supplementary Table 1:** Descriptive statistics of built-up area land cover when aggregated into blue, green, and grey categories

|  | N | Mean | SD | Median | Min | Max | Trimmed | MAD |
| --- | --- | --- | --- | --- | --- | --- | --- | --- |
| Blue Space (%) | 495 | 3.56 | 3.98 | 1.90 | 0.06 | 25.49 | 2.81 | 1.85 |
| Green Space (%) | 495 | 31.82 | 9.63 | 33.08 | 1.67 | 60.60 | 32.25 | 8.97 |
| Grey Space (%) | 495 | 64.61 | 8.99 | 63.38 | 38.94 | 97.97 | 64.14 | 8.08 |

####

**Supplementary Table 2:** Descriptive statistics of blue, green, and grey cover across deciles

|  | N | Mean | SD | Median | Min | Max | Trimmed | MAD |
| --- | --- | --- | --- | --- | --- | --- | --- | --- |
| Blue Space (%) | 10 | 3.56 | 3.03 | 1.94 | 0.28 | 12.95 | 2.79 | 1.89 |
| Green Space (%) | 10 | 31.84 | 3.99 | 33.26 | 24.99 | 36.50 | 32.11 | 2.20 |
| Grey Space (%) | 10 | 64.60 | 1.58 | 64.69 | 62.06 | 67.57 | 64.55 | 1.37 |

####

**Supplementary Table 3:** Habitat groupings (col. 1) used in this study and their source materials (col. 2-3).

| **Grouping:** | **UK CEH Land Cover** | **Ordnance Survey Land Use** |
| --- | --- | --- |
| **Grey space** | - Urban - Suburban | **-** |
| **Greenspace** | - Improved grassland - Neutral grassland - Calcareous grassland - Acid grassland - Arable - Deciduous woodland - Coniferous woodland - Heather grassland - Heather - Inland Rock | **-** |
| **Bluespace** | - Freshwater - Fen - Bog - Littoral sediment - Saltmarsh - Supralittoral sediment - Littoral rock - Supralittoral rock - Saltwater | - **Surface water** - **Tidal water** - **Foreshore** |

**Supplementary Table 4:** Kruskal-Wallis and Dunn’s Test results for grey, green and blue space comparisons across coastal, estuarine and inland built-up areas.

| Land Cover | Test | p_value | Chi² | df |
| --- | --- | --- | --- | --- |
| Blue Space | Kruskal_Wallis | < 2.2e-16 | 183.15 | 2 |
| Green Space | Kruskal_Wallis | 3.55e-11 | 48.12 | 2 |
| Grey Space | Kruskal_Wallis | 0.31 | 2.34 | 2 |

| Land Cover | Test | Comparison | Z score | Adjusted p-value |
| --- | --- | --- | --- | --- |
| Blue Space | Dunn’s | coastal-estuarine | 2.17 | 0.045 |
| Blue Space | Dunn’s | coastal-inland | 12.68 | 1.174424e-36 |
| Blue Space | Dunn’s | estuarine-inland | 6.00 | 2.875832e-09 |
| Green Space | Dunn’s | coastal-estuarine | -0.45 | 0.9758 |
| Green Space | Dunn’s | coastal-inland | -6.24 | 6.725439e-10 |
| Green Space | Dunn’s | estuarine-inland | -3.65 | 3.792939e-04 |
| Grey Space | Dunn’s | coastal-estuarine | -1.41 | 0.2362 |
| Grey Space | Dunn’s | coastal-inland | -0.20 | 1.0000 |
| Grey Space | Dunn’s | estuarine-inland | 1.49 | 0.2051 |

####

####
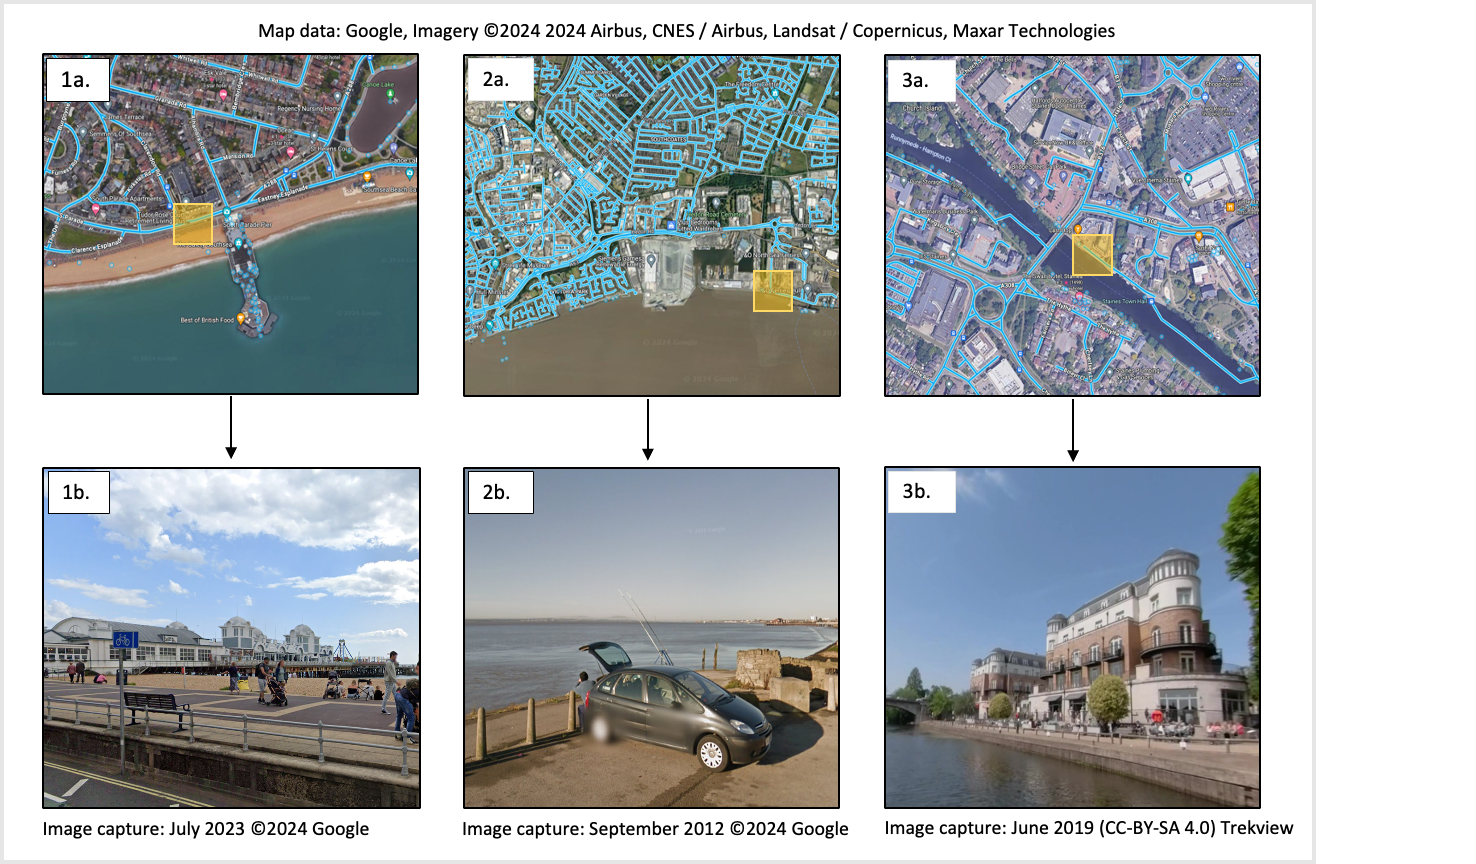


####

#### Supplementary Fig. 1: Examples of how Google Street View was used to ground truth assess blue space accessibility: images 1a. and 1b. shows Portsmouth, a coastal city on the south coast of England with a recreational pier and access to the beach; images 2a. and 2b. represents Kingston Upon Hull, an estuarine city in the north of England, which has several access points to the Humber estuary. In 2b., an angler is shown utilising a public access point amongst an industrial sector; images 3a. and 3b. show Staines-upon-Thames, an inland city with access to the River Thames. 3b. shows developments and footpaths alongside the river being used by the public, captured from a paddleboard user.

####

**Supplementary Table 5:** Summary of built-up area shape amendments and reasons, before assessments of land cover were carried out.

| **Built-up Area Name** | **Modification** | **Reason** |
| --- | --- | --- |
| Milford Haven | Removal of Valero refinery on the opposite side of the estuary and the industrial area on the west. | Completely inaccessible and disconnected from the main built-up area. |
| Tilbury | Removal of Tilbury docks | Completely inaccessible |
| Canvey Island | Removal of the Coryton refinery on the opposite side of Holehaven Creek | Completely inaccessible and disconnected from the main built-up area. |
| Holbury | Removal of the Trant refinery | Completely inaccessible |
| Immingham | Removal of Immingham docks | Completely inaccessible |
| Grangemouth | Removal of the Ineos refinery | Completely inaccessible |
| Bootle | Removal of docks | Completely inaccessible |
| Grimsby | Removal of docks | Completely inaccessible |
| Wallsend | Removal of docks | Completely inaccessible |
| Hillingdon | Removal of Heathrow Airport | Completely inaccessible and disconnected from the main built-up area. |
| Felixstowe | Removal of the Trinity Container Terminal | Completely inaccessible |
| Stanford-le-Hope | Removal of London Gateway Port | Completely inaccessible |
| Redcar | Removal of the Redcar bulk terminal | Completely inaccessible |
| Middlesbrough | Removal of Seal Sands | Completely inaccessible and disconnected from the main built-up area. |


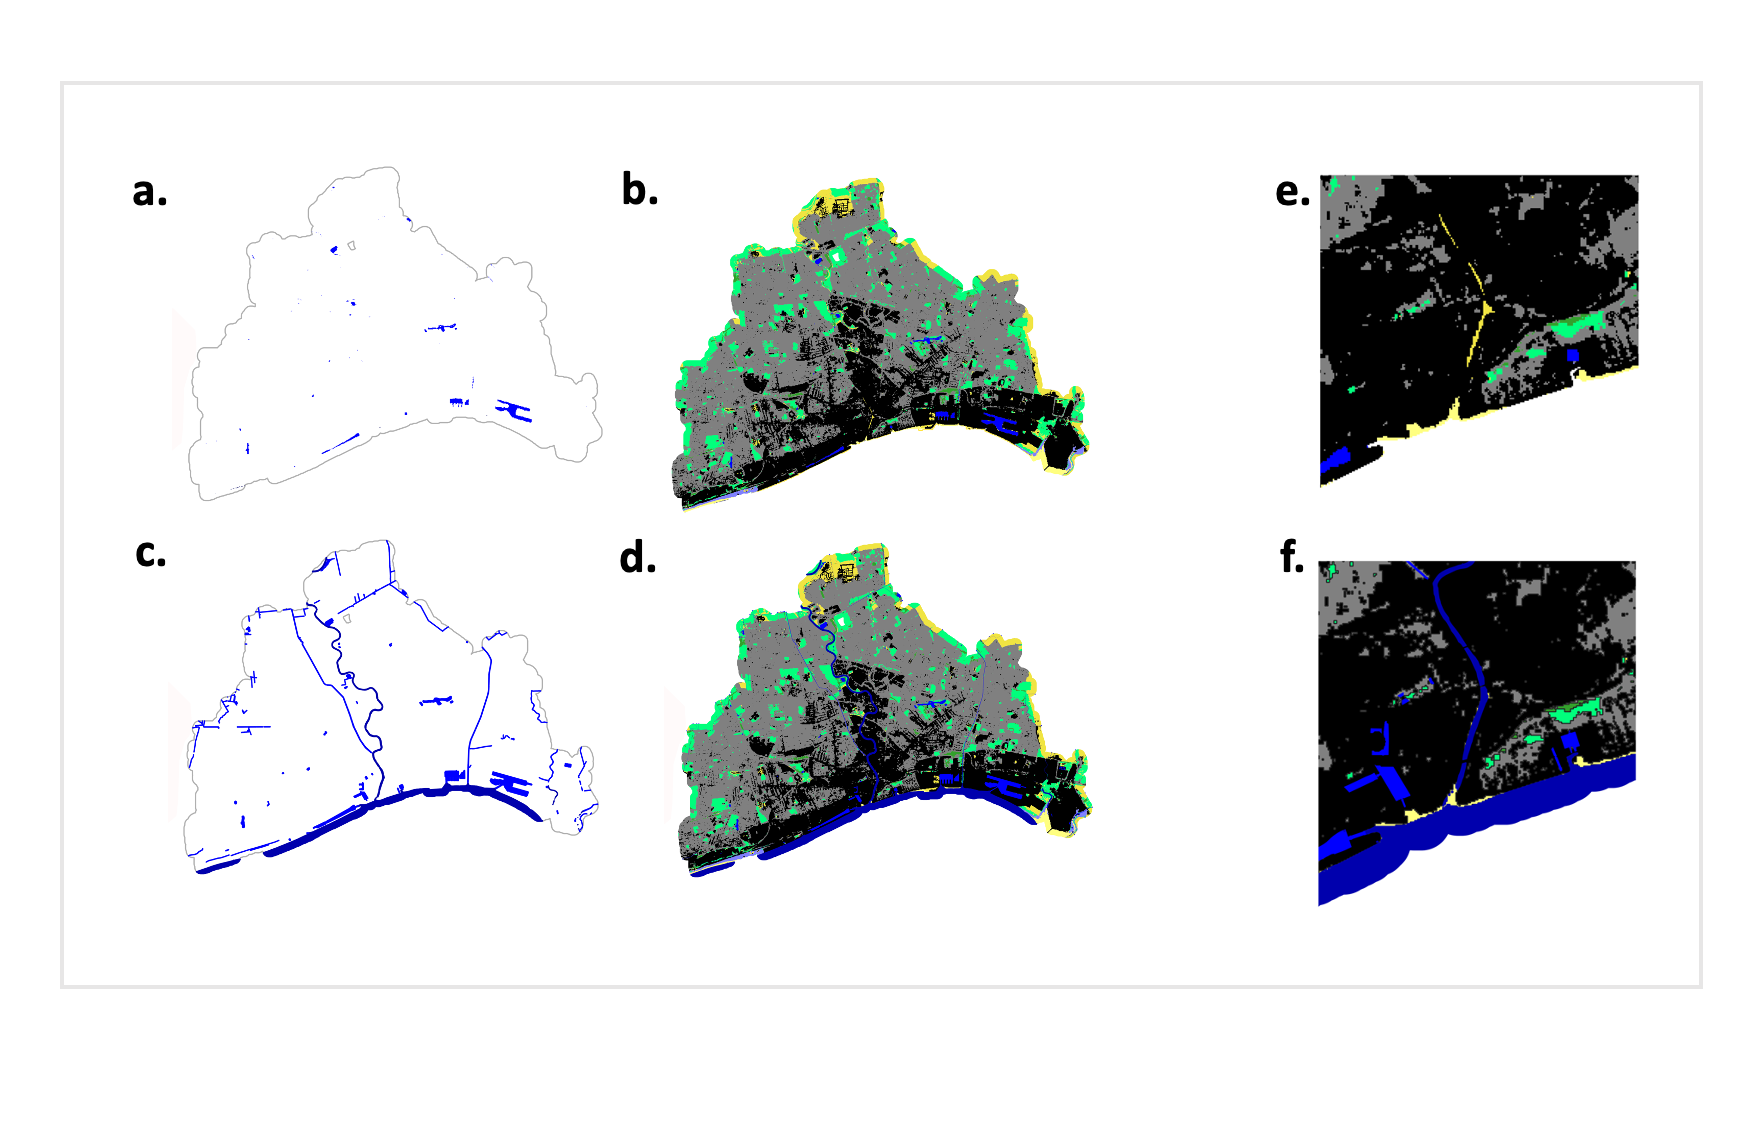


**Supplementary Fig**. **3:** Comparison of land cover and land use data. **a**. represents *Freshwater* and *Saltwater* cover isolated from the land cover dataset (UKCEH). **b.** represents all land cover types (UKCEH). **c.** represents *Tidal Water* and *Surface Water* land use layers (OS), showing the increase of coverage. **d.** represents the composite map after combining the land use and land cover data. **e.** shows a close-up of the blue space representation from UKCEH. **f.** represents a close-up after the additional land use data has been incorporated.


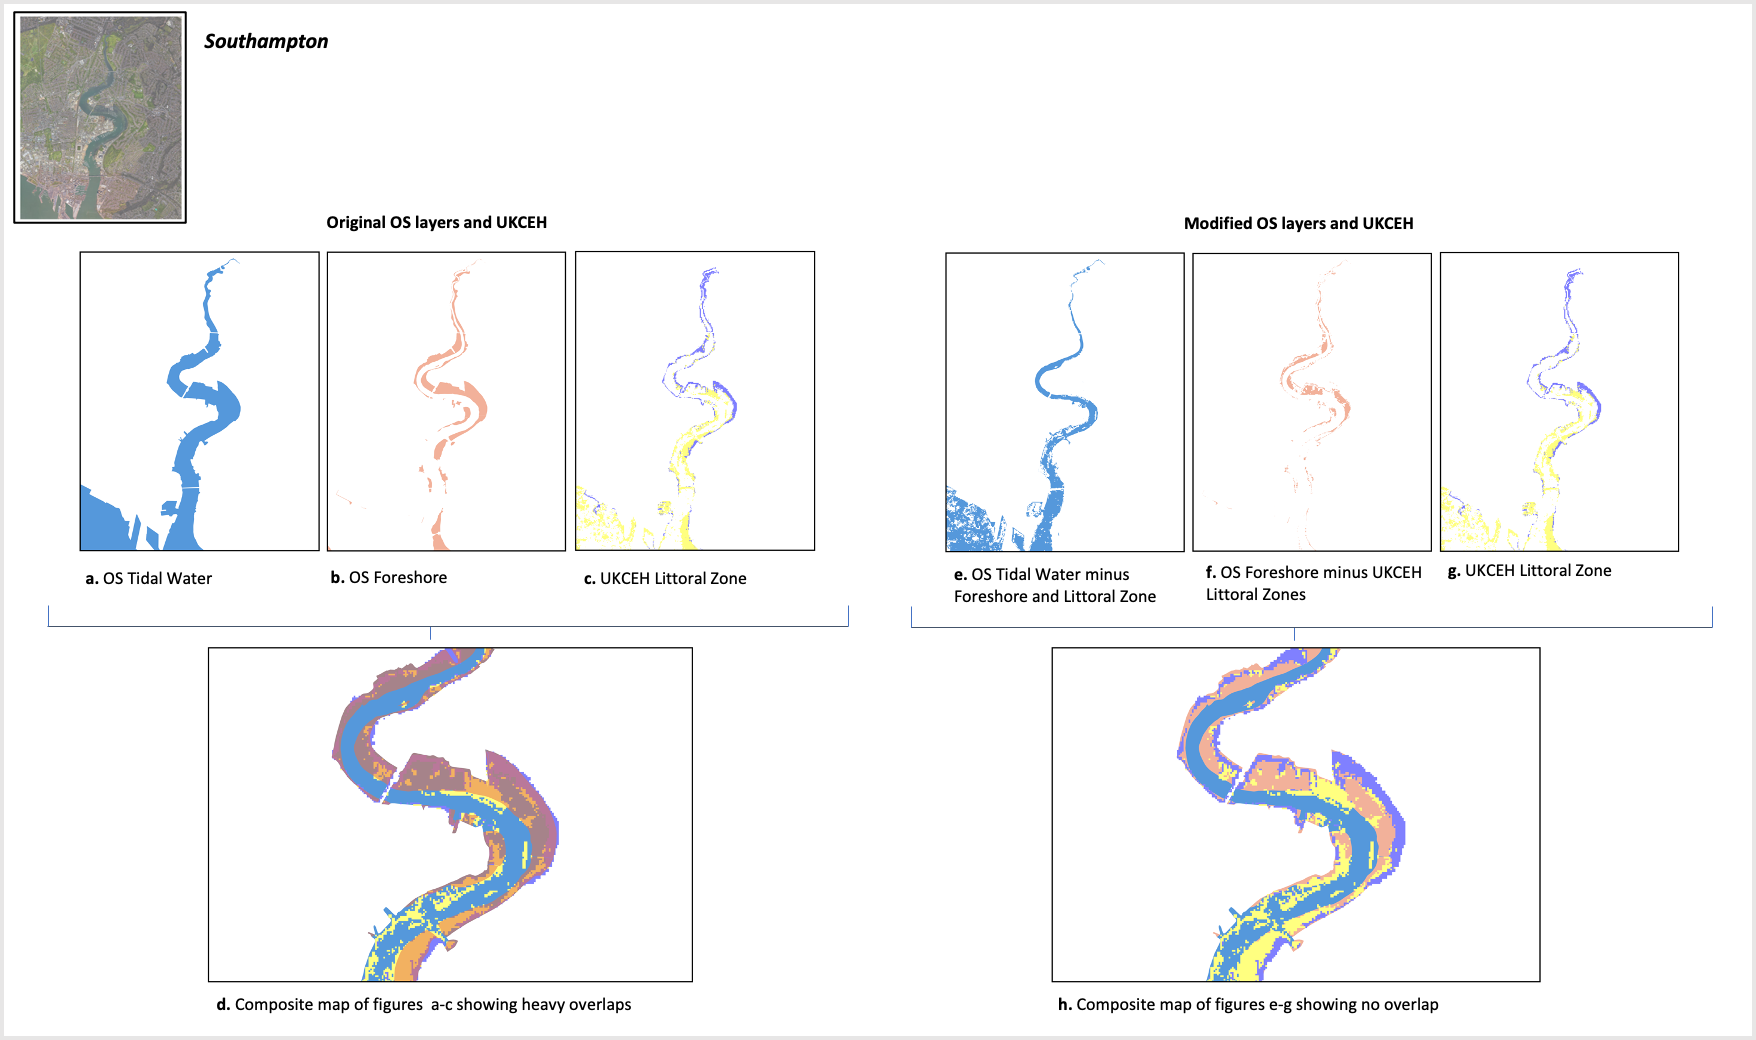


####

#### Supplementary Fig. 3: Geoprocessing of littoral zones. Images a. to c. represent available data for intertidal zones and d. displays the overlapping of information. Images e. to g. show how overlaps were handled to ensure as much resolution as possible for littoral habitats, h. shows the final composition with no overlap.


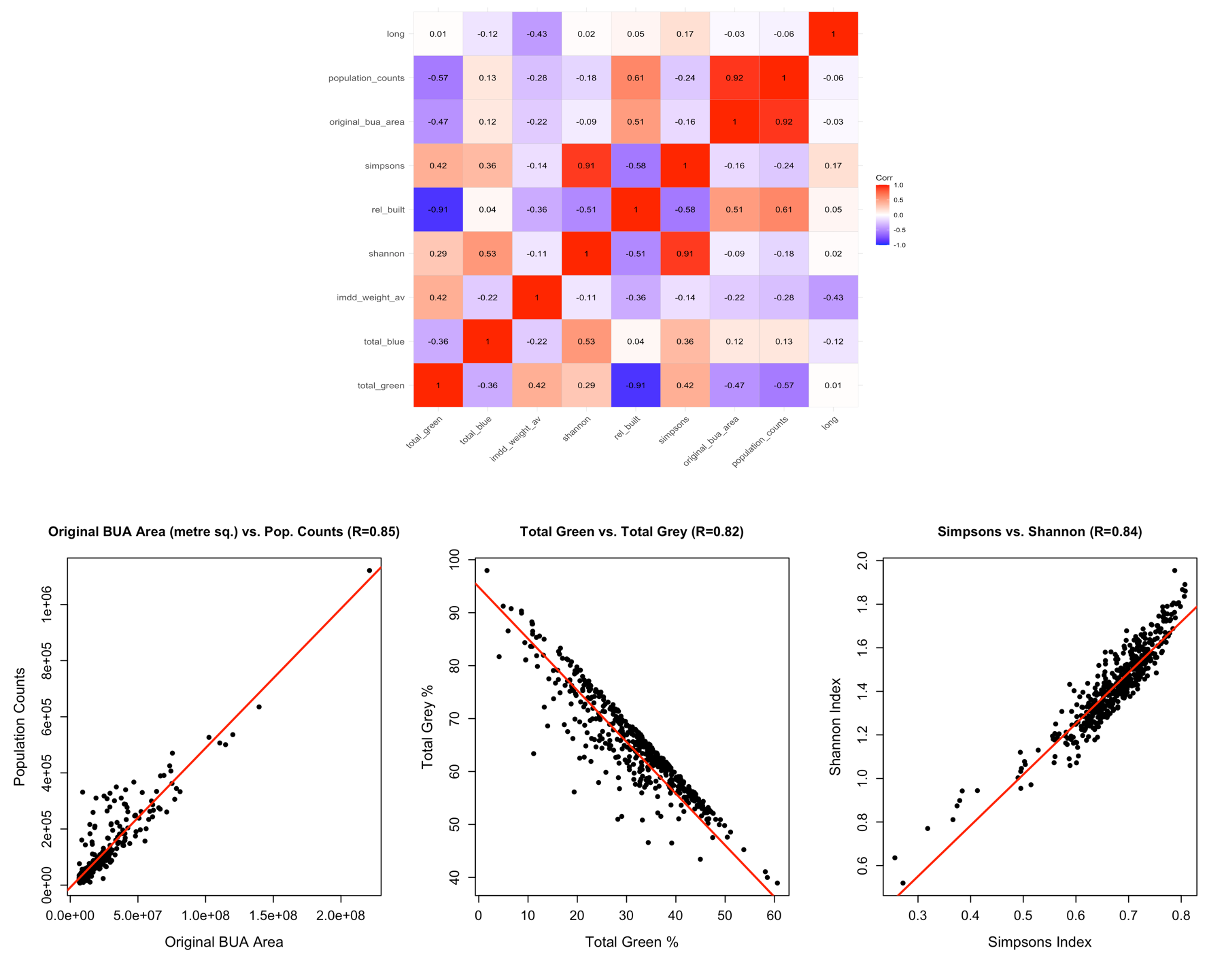


####

#### Supplementary Fig. 4: Correlation matrix created with independent variables considered for the GAM.


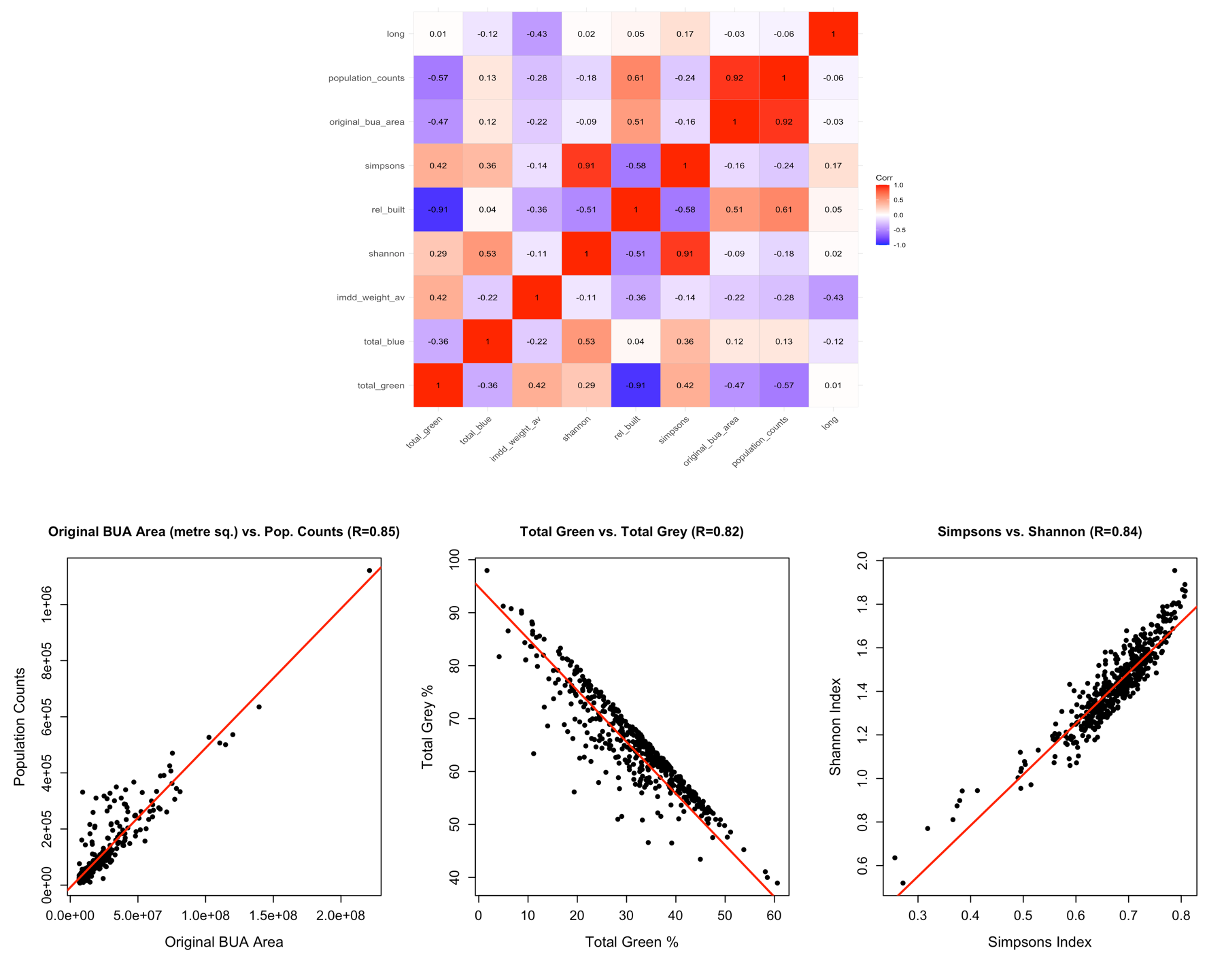


**Supplementary Fig. 5:** Linear models for six variables highlighted in the correlation matrix. From left to right: population count and size; grey space and green space; Shannon’s diversity index and Simpson’s diversity index.

**Supplementary Table 6:** Final GAM comparisons. Model selection was carried out by including all variables and removing non-significant predictors, whilst also alternating between collinear variables (e.g., Shannon’s and Simpson’s diversity indices). The final model was tested with different smoothers to find the best fit.

| **Model Name** | **Formula Terms Summary** | **Smoother Type** | **Adjusted R²** | **Deviance Explained** | **GCV** | **n** |
| --- | --- | --- | --- | --- | --- | --- |
| gam_model1 | total_green + s(log(total_blue)) + shannon + s(log(original_bua_area)) + class + lat + long | Thin plate | 0.443 | 45.50% | 2.0965 | 435 |
| gam_model2 | total_green + s(log(total_blue)) + shannon + long | Thin plate | 0.337 | 34.50% | 2.4694 | 435 |
| **gam_model3 (selected)** | s(total_green) + s(log(total_blue)) + s(simpsons) + s(lat) | Thin plate | 0.524 | 54% | 1.8163 | 435 |
| gam_model4 | s(total_green) + s(log(total_blue)) + s(shannon) + s(lat) | Thin plate | 0.491 | 50.40% | 1.9205 | 435 |
| gam_model3_bs | s(total_green, bs="bs") + s(log(total_blue), bs="bs") + s(simpsons, bs="bs") + s(lat, bs="bs") | Basis spline | 0.518 | 53.20% | 1.8257 | 435 |
| gam_model3_cr | s(total_green, bs="cr") + s(log(total_blue), bs="cr") + s(simpsons, bs="cr") + s(lat, bs="cr") | Cubic regression | 0.508 | 54.10% | 1.9414 | 435 |


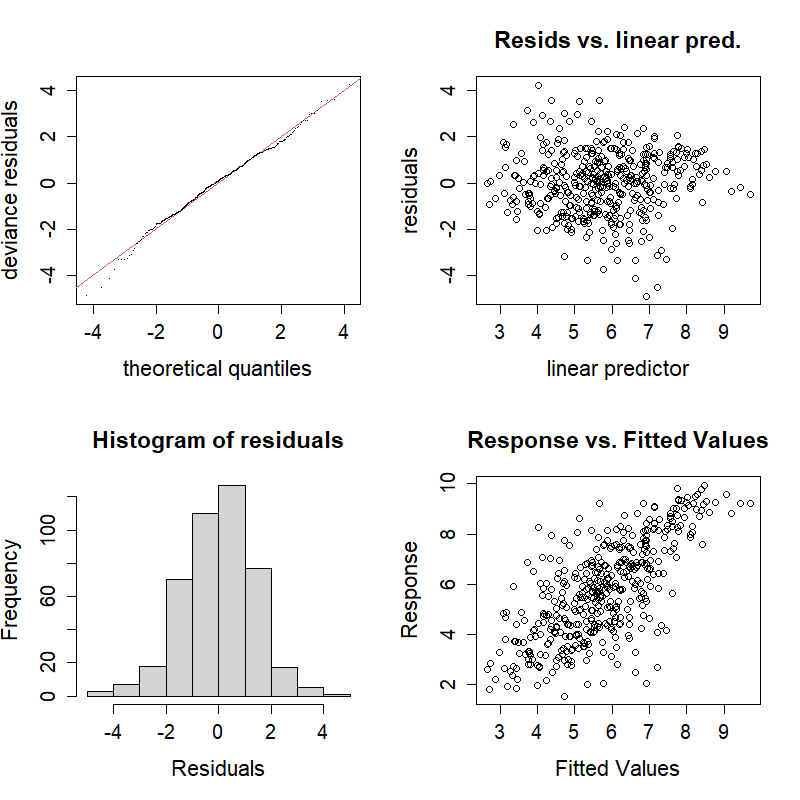


**Supplementary Figure 5:** Diagnostic plots assessing model assumptions and fit quality of the final model selected.


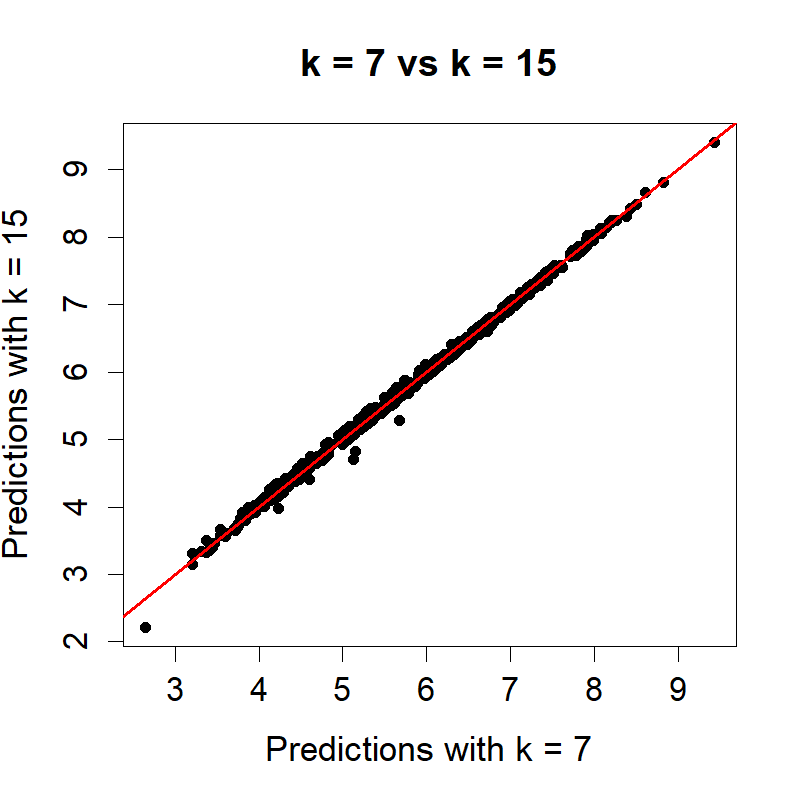


**Supplementary Figure 6:** Comparison of model predictions using smoothing parameter k=7 versus k=15, comparing the effects of smoother complexity on fitted values.

**Supplementary Table 7:** Full list of all built-up areas used in the study, ordered by their blue space ranking

| Rank | Name | Blue Space (%) |
| --- | --- | --- |
| 1 | Great Yarmouth | 25.48586694 |
| 2 | Peterhead | 24.49671066 |
| 3 | Fleetwood | 20.78433437 |
| 4 | Staines-upon-Thames | 19.46306999 |
| 5 | Barrow-in-Furness | 19.01444975 |
| 6 | Canvey Island | 17.76226968 |
| 7 | Blyth (Northumberland) | 17.40723138 |
| 8 | Wallasey | 16.99610407 |
| 9 | Newquay | 15.96850418 |
| 10 | Penarth | 15.88002535 |
| 11 | Rhyl | 15.32099418 |
| 12 | Milford Haven | 14.68216967 |
| 13 | Felixstowe | 14.66983915 |
| 14 | Port Talbot | 14.53890545 |
| 15 | Gosport | 14.42062019 |
| 16 | Dover | 14.34854456 |
| 17 | Lytham St Anne's | 14.34126126 |
| 18 | Tower Hamlets | 14.17372061 |
| 19 | Portsmouth | 13.80131483 |
| 20 | Crosby (Sefton) | 13.45247152 |
| 21 | Workington | 12.82495355 |
| 22 | Maldon | 11.59429649 |
| 23 | Tilbury | 11.5519745 |
| 24 | Lancing and Sompting | 11.51140421 |
| 25 | Weymouth | 11.48045574 |
| 26 | Poole | 11.07825113 |
| 27 | Margate | 10.95093176 |
| 28 | Ramsgate | 10.87018681 |
| 29 | Lowestoft | 10.68194158 |
| 30 | Lee-on-the-Solent | 10.61974607 |
| 31 | Barry (Vale of Glamorgan) | 10.5992346 |
| 32 | Morecambe | 10.5759391 |
| 33 | Eastbourne | 10.49468903 |
| 34 | Chafford Hundred and West Thurrock | 10.14329082 |
| 35 | Whitstable | 10.02313025 |
| 36 | Ash and Ash Vale | 9.990952774 |
| 37 | Llanelli | 9.950528303 |
| 38 | Neath | 9.813931652 |
| 39 | Bognor Regis | 9.760734625 |
| 40 | Clydebank | 9.681878707 |
| 41 | Bexhill-on-Sea | 9.526133446 |
| 42 | Tynemouth | 9.425762161 |
| 43 | Newham | 9.335963097 |
| 44 | Irvine | 9.3142289 |
| 45 | Newport (Newport) | 9.271367863 |
| 46 | Exmouth | 9.152075767 |
| 47 | Dartford | 9.100355045 |
| 48 | Rustington | 9.081222278 |
| 49 | Swansea | 8.948127546 |
| 50 | Christchurch (Bournemouth, Christchurch and Poole) | 8.905421591 |
| 51 | Greenock | 8.790366565 |
| 52 | Broadstairs | 8.773670558 |
| 53 | Rochester | 8.654855389 |
| 54 | Southampton | 8.634078003 |
| 55 | Clacton-on-Sea | 8.602739015 |
| 56 | Southport | 8.557283971 |
| 57 | Aberdeen | 8.530063421 |
| 58 | Larkfield | 8.527887781 |
| 59 | Widnes | 8.512068588 |
| 60 | Renfrew | 8.482638181 |
| 61 | Colwyn Bay | 8.440931143 |
| 62 | Wath upon Dearne | 8.355945673 |
| 63 | Torquay | 8.325874287 |
| 64 | Redcar | 8.273230059 |
| 65 | Long Eaton | 8.272771823 |
| 66 | South Shields | 8.236207801 |
| 67 | Folkestone | 8.100692629 |
| 68 | Richmond upon Thames | 7.739024419 |
| 69 | Hartlepool | 7.728066301 |
| 70 | Prestwick | 7.646058171 |
| 71 | Ayr | 7.639389094 |
| 72 | Seaford | 7.541577652 |
| 73 | Blackpool | 7.53139012 |
| 74 | Hammersmith and Fulham | 7.500171328 |
| 75 | Sittingbourne | 7.380420951 |
| 76 | Runcorn | 7.352695076 |
| 77 | Arbroath | 7.319219883 |
| 78 | Skegness | 7.305552634 |
| 79 | Plymouth | 7.305304627 |
| 80 | Bridgwater | 7.263243603 |
| 81 | Hoddesdon | 7.231048353 |
| 82 | Inverness | 7.202204666 |
| 83 | Gravesend | 6.968619159 |
| 84 | Bridlington | 6.712972886 |
| 85 | Paignton | 6.677533806 |
| 86 | Kirkcaldy | 6.62333081 |
| 87 | Totton | 6.598401198 |
| 88 | Barnstaple | 6.589986443 |
| 89 | Aldershot | 6.473781472 |
| 90 | Whitley Bay | 6.470507227 |
| 91 | Hastings | 6.452872362 |
| 92 | Jarrow | 6.382356775 |
| 93 | Greenwich | 6.332692695 |
| 94 | City of Westminster | 6.306657139 |
| 95 | Southend-on-Sea | 6.270258199 |
| 96 | Grays | 6.250746621 |
| 97 | Barking and Dagenham | 6.207937703 |
| 98 | Whitehaven | 6.189676432 |
| 99 | Dundee | 6.167318285 |
| 100 | Rickmansworth | 5.925457453 |
| 101 | Worthing | 5.879130664 |
| 102 | Alloa | 5.863590901 |
| 103 | Southwark | 5.845105075 |
| 104 | West Molesey | 5.821456538 |
| 105 | Locks Heath | 5.785258049 |
| 106 | Kingston upon Hull | 5.779092612 |
| 107 | Birkenhead | 5.715301215 |
| 108 | Bexley | 5.71233824 |
| 109 | Maidenhead | 5.600406457 |
| 110 | Gillingham (Medway) | 5.556771747 |
| 111 | Caversham | 5.548220709 |
| 112 | Old Trafford | 5.513704791 |
| 113 | Sunderland | 5.50305181 |
| 114 | Brighton and Hove | 5.391759203 |
| 115 | Scarborough | 5.299371936 |
| 116 | Windsor | 5.299130819 |
| 117 | Doncaster | 5.293261381 |
| 118 | King's Lynn | 5.251483782 |
| 119 | Bebington | 5.198288831 |
| 120 | Lancaster | 5.184394353 |
| 121 | Grangemouth | 5.136474842 |
| 122 | Thornaby-on-Tees | 5.134419076 |
| 123 | Weston-super-Mare | 5.033447602 |
| 124 | Humberston and New Waltham | 5.006797546 |
| 125 | Castleford | 4.950299032 |
| 126 | Bournemouth | 4.918666443 |
| 127 | Wandsworth | 4.904877989 |
| 128 | Spalding | 4.900073239 |
| 129 | Reading | 4.891904298 |
| 130 | Billingham | 4.887767806 |
| 131 | Salford | 4.837336863 |
| 132 | Havant | 4.819093638 |
| 133 | Cardiff | 4.695993123 |
| 134 | Ashington (Northumberland) | 4.546671226 |
| 135 | Waltham Forest | 4.41390291 |
| 136 | Ellesmere Port | 4.409208252 |
| 137 | Chichester | 4.385618309 |
| 138 | Havering | 4.366836523 |
| 139 | Stirling | 4.366368249 |
| 140 | Perth | 4.278899227 |
| 141 | Boston | 4.273195546 |
| 142 | Gateshead | 4.204410866 |
| 143 | Farnborough | 4.004038947 |
| 144 | Winchester | 3.977144707 |
| 145 | Eccles (Salford) | 3.97278791 |
| 146 | Newbury | 3.882083565 |
| 147 | Hounslow | 3.869144019 |
| 148 | Abingdon-on-Thames | 3.842039077 |
| 149 | Kensington and Chelsea | 3.799121007 |
| 150 | Droitwich Spa | 3.766062416 |
| 151 | Preston (Preston) | 3.672811986 |
| 152 | Edinburgh | 3.669480212 |
| 153 | Falkirk | 3.653943538 |
| 154 | Newark-on-Trent | 3.653281552 |
| 155 | Denton (Tameside) | 3.637680787 |
| 156 | Newcastle upon Tyne | 3.617537686 |
| 157 | Liverpool | 3.600811311 |
| 158 | Lincoln | 3.596079765 |
| 159 | Bedford | 3.578053453 |
| 160 | St Neots | 3.522245026 |
| 161 | Hillingdon | 3.45054123 |
| 162 | Peterborough | 3.390591641 |
| 163 | Beeston (Broxtowe) | 3.38769797 |
| 164 | Evesham | 3.385652364 |
| 165 | Middlesbrough | 3.369501875 |
| 166 | Urmston | 3.369415343 |
| 167 | Gainsborough | 3.254612922 |
| 168 | Aberdare | 3.250354954 |
| 169 | Salisbury | 3.226363941 |
| 170 | Burton upon Trent | 3.220093212 |
| 171 | Fareham | 3.20779875 |
| 172 | Pontypridd | 3.189424773 |
| 173 | Truro | 3.176624644 |
| 174 | Chatham | 3.143394133 |
| 175 | Egham | 3.135284201 |
| 176 | Ilkeston | 3.129092224 |
| 177 | Hackney | 3.111708482 |
| 178 | Fleet | 3.106844435 |
| 179 | Eastleigh | 3.08084584 |
| 180 | Carlton (Gedling) | 3.062489052 |
| 181 | Norwich | 3.056885799 |
| 182 | Heswall | 3.026384143 |
| 183 | Paisley | 3.01729136 |
| 184 | Sevenoaks | 3.009932776 |
| 185 | Retford | 2.996791034 |
| 186 | Brierley Hill | 2.978847964 |
| 187 | Dumfries | 2.972083787 |
| 188 | Warrington | 2.844007282 |
| 189 | Bletchley | 2.809916307 |
| 190 | Northampton | 2.804673825 |
| 191 | Congleton | 2.772808425 |
| 192 | Formby | 2.771705707 |
| 193 | Leigh (Wigan) | 2.740475904 |
| 194 | Carlisle | 2.71201834 |
| 195 | Leighton Buzzard | 2.705373573 |
| 196 | Warwick | 2.699648715 |
| 197 | Wakefield | 2.681428231 |
| 198 | Milton Keynes | 2.675527292 |
| 199 | Shrewsbury | 2.668475612 |
| 200 | Lambeth | 2.655550021 |
| 201 | Tamworth | 2.653968902 |
| 202 | Dewsbury | 2.642587708 |
| 203 | Ipswich | 2.624793165 |
| 204 | Newport (Isle of Wight) | 2.608563478 |
| 205 | Cheshunt | 2.608083477 |
| 206 | Huntingdon | 2.56872196 |
| 207 | Tipton | 2.565813173 |
| 208 | Bury (Bury) | 2.480565782 |
| 209 | Chester | 2.427329361 |
| 210 | March | 2.414148924 |
| 211 | Stafford | 2.406486689 |
| 212 | Exeter | 2.405220787 |
| 213 | Rugeley | 2.397800095 |
| 214 | Bedworth | 2.392894485 |
| 215 | Bloxwich | 2.367259059 |
| 216 | Thetford | 2.363393959 |
| 217 | Enfield | 2.359003475 |
| 218 | Larbert and Stenhousemuir | 2.344999104 |
| 219 | Stockton-on-Tees | 2.344734632 |
| 220 | Wigan | 2.342768139 |
| 221 | Oxford | 2.341638652 |
| 222 | Rotherham | 2.327093492 |
| 223 | West Bridgford | 2.324636656 |
| 224 | Glasgow | 2.317860685 |
| 225 | York | 2.309664918 |
| 226 | Sale | 2.296221866 |
| 227 | Wisbech | 2.287862104 |
| 228 | Sudbury | 2.239806962 |
| 229 | Worcester | 2.139195566 |
| 230 | Royal Leamington Spa | 2.118671171 |
| 231 | Rowley Regis | 2.115426226 |
| 232 | Canterbury | 2.104121685 |
| 233 | Wellingborough | 2.100114922 |
| 234 | Normanton (Wakefield) | 2.088482241 |
| 235 | Bilston (Wolverhampton) | 2.076576938 |
| 236 | West Bromwich | 2.068513241 |
| 237 | Kirkintilloch | 2.054730459 |
| 238 | Winsford | 2.049365633 |
| 239 | Cambridge (Cambridge) | 2.041875858 |
| 240 | Byfleet | 2.015988944 |
| 241 | Tonbridge | 2.009501547 |
| 242 | Kendal | 1.973325996 |
| 243 | Stratford-upon-Avon | 1.973289168 |
| 244 | Hertford | 1.970821394 |
| 245 | Ascot | 1.962888875 |
| 246 | Hereford | 1.959720171 |
| 247 | Newton Abbot | 1.915396088 |
| 248 | Camberley | 1.896514395 |
| 249 | Hamilton | 1.888442627 |
| 250 | Daventry | 1.876894121 |
| 251 | Witney | 1.862698567 |
| 252 | Bristol | 1.85837194 |
| 253 | Heanor | 1.858207511 |
| 254 | Cambuslang | 1.838509248 |
| 255 | Bolton (Bolton) | 1.833015858 |
| 256 | Brighouse | 1.786231199 |
| 257 | Slough | 1.779137413 |
| 258 | Kettering | 1.749901703 |
| 259 | Haringey | 1.749513249 |
| 260 | Andover | 1.738571115 |
| 261 | Kingswinford | 1.73592501 |
| 262 | Banbury | 1.725491493 |
| 263 | Durham | 1.71773106 |
| 264 | Loughborough | 1.716175666 |
| 265 | Rushden | 1.715847944 |
| 266 | Bridgend | 1.715486439 |
| 267 | Aylesbury | 1.706970888 |
| 268 | St Helens (St. Helens) | 1.699159649 |
| 269 | Keighley | 1.680131272 |
| 270 | Knowle and Dorridge | 1.665081756 |
| 271 | Kingston upon Thames | 1.649758504 |
| 272 | Dudley (Dudley) | 1.635986235 |
| 273 | Scunthorpe | 1.62154081 |
| 274 | Thundersley and South Benfleet | 1.605756901 |
| 275 | Woking | 1.594332504 |
| 276 | Rugby | 1.588733764 |
| 277 | Swindon (Swindon) | 1.584572513 |
| 278 | Ashford (Ashford) | 1.580987201 |
| 279 | St Austell | 1.578521049 |
| 280 | Horwich | 1.57207182 |
| 281 | Maidstone | 1.564674511 |
| 282 | Wokingham | 1.561967193 |
| 283 | Blackburn (Blackburn with Darwen) | 1.546221621 |
| 284 | Ashton-under-Lyne | 1.536163593 |
| 285 | Halifax | 1.520860646 |
| 286 | Stanford-le-Hope | 1.51798847 |
| 287 | Middleton (Rochdale) | 1.465833376 |
| 288 | Chester-le-Street | 1.454652813 |
| 289 | Huddersfield | 1.452995767 |
| 290 | Rawtenstall | 1.450029444 |
| 291 | New Haw, West Byfleet and Sheerwater | 1.446038156 |
| 292 | Birmingham | 1.441778812 |
| 293 | Nottingham | 1.423597173 |
| 294 | Watford (Watford) | 1.423373532 |
| 295 | Bathgate | 1.419927518 |
| 296 | Solihull | 1.415233342 |
| 297 | Bamber Bridge | 1.4070205 |
| 298 | Smethwick | 1.404386874 |
| 299 | Nuneaton | 1.396943717 |
| 300 | Melton Mowbray | 1.396935819 |
| 301 | Gloucester | 1.389112344 |
| 302 | Coventry | 1.386389066 |
| 303 | Derby | 1.385556489 |
| 304 | Hyde (Tameside) | 1.366304146 |
| 305 | Hemel Hempstead | 1.364697665 |
| 306 | Manchester | 1.362185173 |
| 307 | Guildford | 1.359085385 |
| 308 | Willenhall | 1.358752921 |
| 309 | Redhill (Reigate and Banstead) | 1.357490402 |
| 310 | Sutton in Ashfield | 1.342989394 |
| 311 | Mildenhall (West Suffolk) | 1.341032131 |
| 312 | Colchester | 1.329273738 |
| 313 | Burnley | 1.32850201 |
| 314 | Chorley | 1.322315042 |
| 315 | Bicester | 1.321488685 |
| 316 | Walsall | 1.319450643 |
| 317 | Telford | 1.311257848 |
| 318 | Basildon | 1.306241345 |
| 319 | Lewisham | 1.303303671 |
| 320 | Chelmsford | 1.293624741 |
| 321 | Bearsden | 1.288088597 |
| 322 | Elgin | 1.284253779 |
| 323 | Caerphilly | 1.276064957 |
| 324 | Worksop | 1.270254923 |
| 325 | Taunton | 1.269699936 |
| 326 | Farnham | 1.25150423 |
| 327 | East Kilbride | 1.244060229 |
| 328 | Heywood | 1.241701549 |
| 329 | Cumbernauld | 1.232733398 |
| 330 | Little Hulton | 1.230107309 |
| 331 | Redbridge | 1.223603785 |
| 332 | Kenilworth | 1.220801174 |
| 333 | Wilmslow | 1.21159361 |
| 334 | Bath | 1.210748299 |
| 335 | Stoke-on-Trent | 1.205330174 |
| 336 | Kidderminster | 1.204234332 |
| 337 | Oldbury (Sandwell) | 1.200882459 |
| 338 | Merthyr Tydfil | 1.192237703 |
| 339 | Horley (Reigate and Banstead) | 1.187320448 |
| 340 | Reigate | 1.171483525 |
| 341 | Leeds | 1.162859746 |
| 342 | Washington | 1.151979113 |
| 343 | Motherwell | 1.147530186 |
| 344 | Harlow | 1.140779885 |
| 345 | Mansfield | 1.131286371 |
| 346 | Ealing | 1.123467898 |
| 347 | Corby | 1.119364584 |
| 348 | Hinckley | 1.113784765 |
| 349 | Airdrie | 1.10944464 |
| 350 | Cannock | 1.101452077 |
| 351 | Royal Sutton Coldfield | 1.099787324 |
| 352 | Chesterfield | 1.08939095 |
| 353 | Leicester | 1.08361217 |
| 354 | Stockport | 1.074827996 |
| 355 | Stowmarket | 1.073611901 |
| 356 | Bootle (Sefton) | 1.052593514 |
| 357 | Market Harborough | 1.033883745 |
| 358 | Rochdale | 1.032589177 |
| 359 | Stratton St Margaret | 1.023388227 |
| 360 | Camden | 1.016017631 |
| 361 | Ripley (Amber Valley) | 1.015211169 |
| 362 | Livingston | 0.998071477 |
| 363 | Barnsley | 0.995999041 |
| 364 | Bury St Edmunds | 0.994574426 |
| 365 | Kilmarnock | 0.982788779 |
| 366 | Darlington | 0.982097694 |
| 367 | Coatbridge | 0.973909725 |
| 368 | Ebbw Vale | 0.971339859 |
| 369 | Cobham (Elmbridge) | 0.97076212 |
| 370 | Sutton (Sutton) | 0.962857195 |
| 371 | Witham | 0.962424528 |
| 372 | Macclesfield | 0.960721022 |
| 373 | Bishop's Stortford | 0.959266079 |
| 374 | Amersham | 0.957413039 |
| 375 | Brent | 0.957335896 |
| 376 | Bracknell | 0.955079384 |
| 377 | Swadlincote | 0.948854601 |
| 378 | Crawley (Crawley) | 0.938236792 |
| 379 | Wishaw | 0.936921996 |
| 380 | Horsham | 0.921707909 |
| 381 | CwmbrÃ¢n | 0.912947592 |
| 382 | Redditch | 0.911846381 |
| 383 | Yate | 0.910957294 |
| 384 | Stroud | 0.904884932 |
| 385 | Chippenham (Wiltshire) | 0.901299374 |
| 386 | Sheffield | 0.879464001 |
| 387 | Merton | 0.878959897 |
| 388 | Pontypool | 0.875960531 |
| 389 | Accrington | 0.875844844 |
| 390 | Altrincham | 0.865431227 |
| 391 | Wolverhampton | 0.860580129 |
| 392 | Great Bookham and Fetcham | 0.842684519 |
| 393 | Braintree | 0.82403801 |
| 394 | Bishop Auckland | 0.810139653 |
| 395 | Welwyn Garden City | 0.805359763 |
| 396 | Chadderton | 0.801230554 |
| 397 | Hucknall | 0.797670216 |
| 398 | High Wycombe | 0.788256282 |
| 399 | Grimsby | 0.78001373 |
| 400 | Lichfield | 0.776668669 |
| 401 | Haslemere | 0.771504526 |
| 402 | Darwen | 0.769999664 |
| 403 | Frome | 0.7610012 |
| 404 | Golborne | 0.759973254 |
| 405 | Wigston | 0.759825961 |
| 406 | Fulwood | 0.758683914 |
| 407 | Bellshill | 0.756147671 |
| 408 | Beverley | 0.74922081 |
| 409 | Trowbridge | 0.738864871 |
| 410 | Basingstoke | 0.730712264 |
| 411 | Burntwood | 0.728837457 |
| 412 | Immingham | 0.721460599 |
| 413 | Hale (Trafford) | 0.718171958 |
| 414 | Burgess Hill | 0.711643882 |
| 415 | Dereham | 0.699446116 |
| 416 | Stourbridge | 0.688701739 |
| 417 | Rayleigh | 0.68209838 |
| 418 | Wrexham | 0.68175045 |
| 419 | Chandler's Ford | 0.675764208 |
| 420 | Dunstable | 0.663013481 |
| 421 | Hitchin | 0.649970708 |
| 422 | Kingswood and Fishponds | 0.646038075 |
| 423 | Wythenshawe | 0.645546098 |
| 424 | Brentwood | 0.640834666 |
| 425 | Glenrothes | 0.636523858 |
| 426 | Didcot | 0.631016263 |
| 427 | Dunfermline | 0.617723087 |
| 428 | Loughton | 0.600005773 |
| 429 | Bradford | 0.59264914 |
| 430 | Ashton-in-Makerfield | 0.586695238 |
| 431 | Halesowen | 0.574335496 |
| 432 | Waterlooville | 0.570634739 |
| 433 | Barnet | 0.56212928 |
| 434 | Crewe | 0.555844169 |
| 435 | Leyland | 0.555113819 |
| 436 | Newton Mearns | 0.553341204 |
| 437 | St Albans | 0.548411056 |
| 438 | Chorleywood | 0.54518297 |
| 439 | Holbury | 0.531687354 |
| 440 | Kirkby | 0.530681335 |
| 441 | Ewell | 0.525375447 |
| 442 | Bromsgrove | 0.505485733 |
| 443 | Newcastle-under-Lyme | 0.485457636 |
| 444 | Billericay | 0.478241001 |
| 445 | Cheltenham | 0.47657587 |
| 446 | Royal Tunbridge Wells | 0.463454024 |
| 447 | Grantham | 0.460205512 |
| 448 | East Grinstead | 0.45940788 |
| 449 | Catterick Garrison | 0.459328304 |
| 450 | Carterton | 0.449713562 |
| 451 | Wallsend | 0.44619719 |
| 452 | Haverhill | 0.438939051 |
| 453 | Newton Aycliffe | 0.431686788 |
| 454 | Coalville | 0.429502838 |
| 455 | Prescot | 0.418868055 |
| 456 | Cramlington | 0.416586371 |
| 457 | Stevenage | 0.412008703 |
| 458 | Bromley | 0.392539691 |
| 459 | Beaconsfield | 0.391101701 |
| 460 | Yeovil | 0.383574675 |
| 461 | Bushey | 0.366349572 |
| 462 | Huyton with Roby | 0.365084932 |
| 463 | Islington | 0.362949441 |
| 464 | Epsom | 0.35221594 |
| 465 | Harrow | 0.344670125 |
| 466 | Pontefract | 0.338230356 |
| 467 | Wickersley and Bramley | 0.331880662 |
| 468 | Consett | 0.331320758 |
| 469 | Haywards Heath | 0.322857281 |
| 470 | Peterlee | 0.316387135 |
| 471 | Crowborough | 0.312004072 |
| 472 | Harrogate | 0.290687433 |
| 473 | Pudsey | 0.287875048 |
| 474 | Oldham | 0.270031644 |
| 475 | Hatfield | 0.266066467 |
| 476 | Skelmersdale | 0.25711455 |
| 477 | Ormskirk | 0.246320389 |
| 478 | Batley | 0.238852758 |
| 479 | Borehamwood | 0.237576443 |
| 480 | Horndean | 0.233924002 |
| 481 | Harpenden | 0.228886921 |
| 482 | Arnold | 0.222968348 |
| 483 | Willerby and Anlaby | 0.212139399 |
| 484 | Morley (Leeds) | 0.204166475 |
| 485 | Luton | 0.203810158 |
| 486 | Great Malvern | 0.198036858 |
| 487 | Sedgley | 0.194006373 |
| 488 | Longbenton | 0.192746248 |
| 489 | Letchworth | 0.158970426 |
| 490 | Tadworth and Epsom Downs | 0.13720395 |
| 491 | Eston | 0.125829474 |
| 492 | Croydon | 0.113732255 |
| 493 | Caterham | 0.077504124 |
| 494 | Newmarket | 0.075662736 |
| 495 | Hazlemere | 0.055563727 |
